# Supplementary material for: Simulating the spread of selection-driven genotypes using landscape resistance models for desert bighorn sheep
Source: PLoS One. 2017 May 2;12(5):e0176960. doi: 10.1371/journal.pone.0176960 (PMC5413035; doi:10.1371/journal.pone.0176960)
Supplement: S2 Dataset — (CSV) [file pone.0176960.s004.csv]

*Coordinates are in North American Albers Equal Area Conic projected coordinate system (units=meters)
Individual ID	AE129a	AE129b	HH62a	HH62b	MAF33a	MAF33b	MAF48a	MAF48b	OarFCB193a	OarFCB193b	TGLA387a	TGLA387b	BL4a	BL4b	MAF209a	MAF209b	MAF36a	MAF36b	MAF65a	MAF65b	AE16a	AE16b	FCB11a	FCB11b	FCB266a	FCB266b	FCB304a	FCB304b	JMP29a	JMP29b	TCRBV62a	TCRBV62b	Easting	Northing
GR001	179	187	106	122	122	124	126	128	113	113	147	147	162	162	116	116	87	87	118	130	96	98	127	129	97	97	144	148	131	145	169	173	-1323268.173	-275235.6464
GR004	179	179	106	116	122	122	124	128	107	113	147	149	162	162	114	114	87	95	134	134	88	96	127	129	97	101	144	148	131	131	167	173	-1323268.532	-275225.9464
GR005	177	179	0	0	124	126	126	128	105	117	141	147	162	162	114	116	87	87	118	118	88	98	0	0	101	101	144	146	131	141	169	175	-1323271.071	-275229.8293
GR009	179	187	114	122	124	124	128	128	113	117	145	147	162	162	116	122	87	87	130	148	84	98	127	129	97	103	144	144	131	131	171	175	-1337279.957	-299407.6938
GR010	177	179	106	122	122	132	128	128	107	113	141	147	162	162	116	118	87	87	118	148	88	96	125	125	101	101	144	148	131	131	173	173	-1323276.003	-275224.7606
GR012	179	179	106	106	122	124	124	126	113	113	147	147	162	162	114	116	87	99	130	134	88	98	127	129	97	101	144	144	131	131	173	173	-1319509.289	-274270.0643
GR014	177	179	116	128	122	124	128	128	107	117	145	149	162	162	114	122	87	97	130	134	88	88	127	129	101	101	144	148	131	131	173	175	-1319509.026	-274316.1804
GR015	179	185	104	118	124	124	126	126	107	113	147	147	158	162	122	122	87	87	120	120	92	98	125	129	95	101	144	144	133	145	167	173	-1319376.744	-274506.4762
GR016	179	179	106	112	126	132	126	128	107	117	147	147	162	162	116	116	87	87	118	148	88	96	125	127	101	101	144	144	131	141	169	173	-1319450.074	-274927.7172
GR018	177	179	108	108	122	124	126	126	113	113	141	147	162	162	116	116	95	95	130	132	88	88	127	127	97	101	144	144	131	131	0	0	-1313709.669	-267687.4211
GR020	179	179	112	122	124	132	124	128	111	111	141	147	162	162	116	116	95	95	134	148	96	96	125	127	97	101	144	148	131	145	171	173	-1313708.861	-267990.1387
GR027	177	179	108	128	122	124	124	126	107	117	147	149	158	162	116	122	87	87	132	148	98	98	125	127	101	101	144	148	127	131	167	169	-1326964.45	-288115.784
GR028	179	179	112	116	122	132	124	128	111	113	141	147	162	162	114	116	95	95	134	134	88	98	127	127	97	101	144	144	131	145	171	173	-1327869.826	-289462.3165
GR029	179	179	106	108	122	124	124	126	113	113	141	147	162	162	116	122	87	95	130	134	98	98	125	129	97	103	144	144	127	131	167	169	-1327869.993	-289463.3611
GR031	179	187	116	120	122	124	124	126	107	107	141	149	162	162	114	114	87	99	134	148	88	88	127	129	101	101	144	144	131	131	167	171	-1337139.711	-299220.6692
GR032	179	179	106	114	122	124	128	128	113	113	145	149	162	162	114	116	87	95	130	134	88	98	127	129	101	103	144	148	131	131	173	175	-1337093.805	-299113.7771
GR035	177	179	106	108	124	124	124	126	117	117	141	141	162	162	114	118	87	95	118	118	96	96	125	127	97	101	144	148	131	131	167	173	-1338914.788	-333455.3707
GR036	177	179	108	112	124	124	126	128	113	117	141	147	162	162	114	124	87	99	118	134	84	98	125	129	101	101	144	144	131	131	171	173	-1349293.886	-350300.2067
GR037	179	183	104	112	124	124	126	128	113	113	141	145	162	162	114	116	99	99	118	148	88	98	127	129	101	103	144	144	131	141	171	175	-1349301.712	-350300.6426
GR039	179	179	112	116	122	124	122	126	107	113	141	149	162	162	116	122	87	99	134	148	88	88	125	125	101	101	144	148	131	131	169	173	-1349286.233	-350301.0715
GR040	179	179	112	130	122	124	122	126	113	113	145	147	158	162	122	124	99	99	118	120	98	98	125	125	101	101	144	144	131	141	173	175	-1360216.627	-345837.9852
GR042	177	185	120	120	124	126	122	122	107	115	147	149	158	158	122	122	87	103	118	120	88	98	125	125	89	101	144	144	131	131	173	175	-1376278.191	-338230.0821
GR043	169	179	104	104	124	124	122	124	115	117	145	151	162	162	122	122	87	103	130	132	88	92	125	129	89	101	144	144	131	131	175	175	-1376276.703	-338219.5805
GR044	177	179	108	112	124	126	122	128	105	117	147	147	158	162	114	118	87	103	120	134	84	88	125	129	101	101	144	146	131	141	167	175	-1396645.775	-319754.8342
GR045	177	177	108	112	124	124	126	126	105	107	147	147	162	162	114	118	99	99	132	132	88	98	125	129	89	101	144	146	131	141	167	169	-1396717.073	-319946.9109
GR046	169	177	108	112	126	132	122	126	107	111	147	149	162	162	116	118	87	99	118	132	88	88	125	129	101	101	144	148	131	131	171	171	-1396721.958	-319911.8912
GR047	169	169	104	106	124	126	124	126	107	107	149	151	158	162	116	124	103	103	118	132	88	98	125	129	95	101	148	150	131	145	171	175	-1390219.263	-307825.9743
GR048	171	177	104	120	124	126	126	126	107	107	145	147	158	162	116	118	95	99	120	120	88	88	125	127	101	101	148	148	131	141	167	169	-1390299.588	-307072.6218
GR051	179	185	104	118	122	124	122	124	115	117	145	147	158	162	122	122	99	103	118	130	88	98	125	125	89	89	144	148	131	131	171	173	-1396981.617	-320023.8965
GR052	177	177	106	110	126	132	126	126	107	113	147	147	158	158	116	122	95	103	148	148	88	88	125	129	101	101	148	148	129	131	169	173	-1420045.793	-311022.2087
GR053	169	171	106	108	132	132	126	126	107	107	149	149	162	162	116	118	87	99	118	148	84	88	125	125	89	101	144	148	131	131	169	169	-1394781.879	-302794.0563
GR054	169	177	108	118	124	126	126	126	107	113	141	149	162	162	116	118	87	99	118	148	88	88	127	129	101	103	148	148	131	131	169	169	-1400422.924	-301258.6104
GR055	171	185	104	108	122	124	126	126	113	117	147	147	162	162	116	122	95	103	118	132	88	88	127	127	101	101	144	148	131	141	167	171	-1401271.616	-300847.3657
GR056	169	179	104	106	124	132	124	126	107	113	147	149	162	162	118	122	87	103	118	118	88	94	125	125	89	101	144	148	131	131	169	171	-1411201.94	-304489.7171
GR057	167	177	108	118	124	126	122	126	113	117	147	147	162	162	118	118	87	99	118	132	92	98	125	127	101	101	146	148	131	131	171	171	-1411231.906	-304493.506
GR058	177	179	104	122	122	128	122	128	113	115	149	149	162	162	114	118	87	87	118	118	92	96	125	129	101	101	144	148	131	131	167	177	-1420290.02	-310834.4303
GR059	177	179	108	110	124	126	126	126	107	113	147	147	158	162	116	118	99	103	118	148	88	98	125	125	101	101	144	148	129	141	169	173	-1421158.796	-310162.3313
GR060	177	177	108	108	124	124	124	126	105	113	147	149	158	162	116	118	99	103	118	148	88	92	129	129	89	101	144	148	131	137	167	167	-1452268.311	-318291.9771
GR061	167	169	104	130	132	132	122	126	113	115	145	149	162	162	118	122	99	103	118	126	92	92	129	129	101	101	144	148	133	141	173	177	-1452312.263	-318237.9897
GR062	167	167	104	108	126	132	126	126	113	113	147	149	162	162	118	118	99	99	118	118	88	92	125	129	101	101	148	148	131	141	169	177	-1452249.617	-318294.9204
GR063	171	179	112	112	124	124	122	122	113	113	145	151	158	158	120	122	95	99	132	132	82	88	129	129	101	101	144	148	129	141	171	171	-1471588.747	-348112.17
GR065	177	179	104	108	126	126	122	122	111	111	151	151	162	162	114	114	87	95	118	134	92	94	125	127	101	101	144	144	131	133	175	175	-1471685.87	-348022.8443
GR066	179	179	112	122	124	126	126	128	111	115	147	151	162	162	116	120	87	97	118	118	88	88	125	125	101	101	144	144	127	131	171	173	-1472125.685	-352073.1306
GR067	169	177	106	120	122	126	124	126	107	113	145	147	158	158	122	122	99	99	132	132	88	92	125	125	95	101	144	144	131	131	175	179	-1359047.574	-347878.2574
GR068	177	179	112	128	126	132	128	128	105	113	141	147	162	162	116	116	87	97	118	148	88	98	125	127	101	101	144	146	131	141	169	169	-1319005.614	-274274.1659
GR069	179	183	112	128	124	124	124	126	111	117	149	151	162	162	116	116	97	97	126	126	82	92	129	129	89	101	144	144	127	141	169	173	-1472258.754	-344368.7799
GR075	179	179	106	108	122	124	126	128	113	113	147	147	162	162	116	124	87	87	118	132	96	98	125	125	101	103	144	148	131	131	173	173	-1313710.584	-268018.7989
GR087	177	187	108	120	124	124	126	126	107	113	141	147	162	162	114	118	87	99	134	148	88	96	125	127	101	101	144	148	131	131	167	171	-1337200.387	-299323.9249
GR093	171	179	104	130	124	124	122	122	107	117	141	151	162	162	122	122	99	99	118	132	84	98	125	129	95	101	144	148	141	141	173	175	-1360255.916	-345869.0666
GR096	179	179	104	112	122	126	122	124	107	113	151	153	158	162	114	116	95	97	132	132	98	98	129	129	89	101	144	144	133	141	171	175	-1376180.377	-339100.4763
GR100	177	179	112	112	124	124	122	126	105	107	147	147	162	162	114	114	99	103	132	134	84	88	125	125	89	101	144	146	131	131	167	167	-1396722.455	-319992.0805
GR102	169	177	112	118	124	126	126	126	107	107	147	149	162	162	116	118	87	87	132	148	88	92	125	125	101	103	144	148	131	131	169	171	-1396710.304	-319994.0009
GR105	177	179	104	118	124	132	124	126	113	115	141	151	0	0	118	122	99	99	130	132	88	98	125	125	89	89	144	144	131	133	173	173	-1390217.695	-307836.135
GR106	179	183	118	118	124	126	122	126	107	115	141	141	158	158	116	122	99	103	118	120	88	98	125	125	101	101	144	148	131	141	171	173	-1390407.558	-307231.3156
GR107	179	183	110	120	124	126	124	126	117	117	141	151	158	162	116	118	99	103	118	134	84	88	125	127	95	101	148	148	131	141	173	175	-1390302.34	-307058.3626
GR108	177	179	104	112	124	132	122	126	113	117	147	149	158	162	118	122	87	95	132	148	88	88	127	127	101	103	146	148	131	145	173	175	-1390324.316	-306598.351
GR110	177	179	104	118	124	124	126	126	113	113	141	149	162	162	118	122	87	99	120	148	88	92	125	127	101	103	144	148	131	141	167	175	-1390301.233	-307066.8997
GR112	171	177	108	120	122	132	126	126	107	113	0	0	162	162	116	116	99	99	120	120	88	88	125	129	101	101	146	148	131	145	171	177	-1395104.526	-302447.9636
GR114	0	0	104	120	124	126	126	128	113	115	0	0	0	0	118	122	99	99	118	118	92	98	125	129	101	101	148	150	131	131	167	169	-1395129.366	-302439.2788
GR119	169	169	106	108	124	126	126	126	107	113	0	0	0	0	116	118	87	99	148	148	88	92	125	127	89	101	148	148	131	137	169	173	-1400318.219	-301274.3489
GR121	179	179	110	122	122	124	126	126	113	117	147	149	0	0	118	118	95	103	118	118	88	88	125	129	101	101	144	148	129	131	169	177	-1420344.882	-310954.1945
GR122	169	179	104	104	126	128	126	128	113	115	145	149	162	162	114	122	87	103	118	118	0	0	0	0	0	0	0	0	0	0	0	0	-1420317.282	-310943.5659
GR123	167	169	104	118	124	128	126	128	0	0	0	0	162	162	116	122	87	87	118	148	0	0	0	0	0	0	0	0	0	0	0	0	-1420262.468	-310966.1235
GR125	177	177	106	108	124	126	126	126	113	117	147	149	158	162	122	122	87	103	120	148	0	0	0	0	0	0	0	0	0	0	0	0	-1420403.205	-310900.0492
GR126	167	179	108	112	122	126	122	124	107	113	147	149	162	162	118	118	99	99	118	134	88	88	0	0	101	101	148	148	131	137	169	171	-1421107.502	-309940.3389
GR127	177	179	108	108	132	132	124	126	113	113	145	147	162	162	116	116	87	99	118	132	88	88	0	0	101	101	148	148	131	141	0	0	-1434815.78	-313989.7764
GR129	169	177	104	104	124	128	122	126	107	113	145	149	162	162	118	118	87	87	118	148	88	92	125	129	101	101	148	148	131	141	169	177	-1452290.071	-318272.5054
GR132	167	169	118	120	124	124	122	126	107	113	145	147	162	162	114	116	99	99	118	148	92	92	0	0	101	101	148	148	131	141	175	175	-1449672.419	-318563.7967
GR133	171	183	112	128	124	126	122	124	111	113	151	151	164	164	114	116	87	95	118	132	88	88	0	0	89	101	144	144	129	135	171	175	-1471681.072	-342017.3383
GR134	177	183	104	128	124	126	122	126	111	115	151	151	162	162	116	124	97	97	118	126	92	94	0	0	101	101	144	144	131	131	171	175	-1472558.233	-344782.2456
GR135	171	177	112	112	124	124	122	124	111	115	151	151	162	162	114	120	95	103	126	132	88	92	0	0	101	101	144	144	127	129	171	171	-1471631.221	-348061.8842
GR137	169	183	112	128	124	126	122	126	105	111	151	151	162	162	116	116	87	97	126	126	88	92	0	0	89	101	144	144	131	135	171	175	-1472117.435	-352068.3095
GR138	179	179	112	112	126	126	122	128	105	107	0	0	162	162	114	124	87	99	118	132	88	88	125	127	101	101	144	144	129	131	171	171	-1472099.364	-352068.6506
GR140	171	179	112	116	124	126	124	124	105	117	147	149	162	162	114	122	97	99	118	118	88	92	125	127	89	101	144	144	127	129	171	175	-1472115.607	-352074.0522
GR141	177	179	104	112	124	124	122	126	107	117	141	145	158	162	116	122	97	103	120	120	98	98	125	125	95	101	144	144	131	131	173	179	-1370058.468	-346159.9345
GR142	179	179	104	104	124	124	122	122	107	107	145	145	162	162	114	116	97	103	120	130	98	98	127	127	101	101	144	144	131	133	175	179	-1370057.828	-346185.7175
GR144	179	185	104	130	124	124	122	122	107	107	145	145	162	162	116	122	97	103	130	132	98	98	127	127	95	101	144	144	131	131	175	175	-1370078.231	-346181.4141
GR145	179	185	104	130	124	124	122	126	107	107	145	145	162	162	116	122	97	97	120	132	98	98	125	127	95	101	144	148	131	131	179	179	-1370065.14	-346183.4887
GR147	177	177	108	112	126	126	126	128	117	117	147	147	162	162	118	118	87	99	132	134	88	98	0	0	95	101	144	146	131	133	167	167	-1355558.128	-343507.3966
GR154	169	177	106	108	126	132	126	126	113	113	141	149	162	162	116	118	87	99	118	130	88	88	127	129	89	101	148	148	131	131	171	177	-1411216.966	-304484.0899
GR155	167	179	112	120	124	124	124	126	107	107	149	149	162	162	116	116	87	99	134	148	92	92	129	129	101	101	148	148	137	141	171	175	-1421064.323	-310070.2163
GR156	179	179	106	128	122	124	124	128	113	113	147	147	162	162	114	114	87	99	134	148	88	96	127	129	101	101	144	146	131	141	167	169	-1323271.455	-275250.126
GR158	179	179	106	112	124	124	126	128	113	117	141	147	162	162	118	122	87	87	118	130	88	98	125	129	101	103	144	148	141	145	175	175	-1323270.4	-275225.65
GR163	177	179	104	118	124	124	126	128	115	117	145	147	0	0	122	122	99	103	118	132	88	88	125	125	101	101	148	148	131	141	171	173	-1397855.305	-316674.5048
GR164	177	179	104	108	124	126	124	126	115	117	141	151	162	162	114	116	99	99	120	132	98	98	125	129	89	101	144	144	131	141	167	175	-1376182.007	-339072.5416
GR165	171	179	108	120	132	132	126	126	113	117	145	147	162	162	116	122	95	99	120	120	88	94	127	129	101	101	146	148	141	145	169	177	-1400310.257	-301275.7963
GR170	179	185	108	112	122	124	124	126	107	107	147	153	158	162	114	116	87	97	120	132	84	98	129	129	89	101	144	144	131	133	175	175	-1376179.835	-339085.2265
GR173	169	179	104	106	124	132	126	126	115	117	141	151	158	158	118	122	87	99	118	132	88	98	125	129	101	101	144	148	131	131	171	175	-1397522.149	-316541.4855
GR175	179	179	106	118	122	126	126	126	105	107	141	151	158	158	122	122	99	103	132	134	88	98	125	129	101	101	144	144	131	131	171	173	-1390511.563	-309821.6082
GR176	167	169	104	118	124	126	124	126	107	107	149	149	162	162	116	120	87	87	118	132	92	92	125	125	101	101	148	148	141	141	169	169	-1460431.129	-326814.0724
GR180	177	179	112	130	122	126	122	126	107	113	145	147	158	162	122	122	87	99	118	132	98	98	125	125	101	101	144	144	129	131	173	175	-1360258.721	-345868.6218
GR184	177	179	104	118	122	126	124	126	113	117	141	141	158	158	116	122	99	103	118	126	84	88	125	129	89	101	144	146	131	141	167	171	-1397552.81	-316547.3433
GR185	0	0	104	104	124	128	124	126	113	113	0	0	162	162	118	118	99	99	118	130	88	92	125	127	101	103	146	150	131	133	167	167	-1411220.523	-304491.8043
GR188	169	185	104	118	124	126	124	124	111	115	141	151	158	162	118	122	87	99	132	132	98	98	0	0	101	101	0	0	131	133	173	175	-1397552.81	-316547.3433
GR190	177	179	112	112	124	124	124	124	113	115	151	151	162	162	114	124	95	95	126	126	88	88	0	0	0	0	144	144	127	131	171	179	-1472107.033	-352072.0248
GR196	169	169	104	106	124	124	126	126	107	115	141	149	158	158	116	122	95	103	120	132	92	98	127	129	89	101	144	148	129	141	173	175	-1403563.18	-301292.5974
GR197	171	185	104	118	122	124	126	126	107	115	147	147	162	162	118	118	95	99	118	120	88	92	0	0	101	101	144	148	131	141	0	0	-1403927.99	-300995.369
GR200	169	179	0	0	0	0	126	126	0	0	147	149	162	162	0	0	0	0	118	148	0	0	0	0	101	101	144	148	129	131	0	0	-1420032.869	-311022.2397
GR203	177	179	104	112	122	126	124	126	107	113	145	153	162	162	122	122	87	99	118	120	98	98	0	0	89	101	144	144	129	141	173	173	-1360245.148	-345833.051
GR205	177	179	106	108	124	126	124	126	113	117	141	141	162	162	114	124	87	87	118	118	88	98	127	127	97	101	144	144	127	131	167	171	-1339923.21	-337429.1321
GR207	177	179	104	118	124	124	122	122	113	117	141	145	0	0	122	122	97	97	118	132	92	98	0	0	95	101	144	144	131	141	173	175	-1360230.651	-345837.0815
GR208	179	179	104	118	124	126	122	126	107	117	141	145	162	162	116	122	97	97	118	132	98	98	127	127	95	101	144	148	141	145	0	0	-1360260.591	-345868.3253
GR210	169	179	106	120	124	126	126	126	113	113	141	149	162	162	116	118	87	99	118	148	88	92	127	129	101	103	148	148	131	131	169	171	-1403912.47	-300644.5721
GR212	167	177	104	118	124	126	126	126	107	113	145	149	162	162	116	118	87	99	118	148	92	92	0	0	101	101	148	148	137	141	0	0	-1460421.765	-326810.5998
GR213	177	185	104	118	122	124	122	124	113	113	141	147	158	162	122	122	87	97	118	132	88	92	125	127	101	101	144	144	129	141	173	173	-1360249.466	-345864.7387
GR215	167	169	118	118	124	126	124	128	113	113	147	149	162	162	116	116	87	99	118	148	88	92	125	129	101	101	148	148	141	141	169	175	-1420306.474	-310965.6034
GR218	179	179	112	128	126	126	126	128	105	111	141	145	162	164	116	124	97	99	118	126	82	88	0	0	101	101	144	144	127	131	169	171	-1471590.076	-348101.9499
GR222	169	179	104	122	124	124	126	126	113	115	145	145	162	162	118	118	87	103	118	130	88	98	0	0	89	101	144	148	133	137	0	0	-1395076.26	-302475.4977
GR223	169	185	104	108	122	126	122	122	115	115	149	151	158	162	122	122	87	105	118	130	88	92	125	125	89	101	144	148	131	141	175	175	-1395287.17	-302555.5923
GR224	177	179	112	120	124	132	126	126	115	117	147	147	162	162	116	122	95	99	120	120	88	94	125	127	101	101	148	148	131	141	169	169	-1395112.391	-302429.1142
GR231	179	179	104	104	124	124	124	124	107	111	145	151	158	158	116	122	103	103	126	132	92	98	129	129	89	89	144	148	131	131	171	175	-1395285.239	-302567.8631
GR233	177	177	112	116	122	126	126	128	105	107	141	145	162	162	116	122	87	97	118	130	88	98	125	127	101	101	144	148	131	141	175	175	-1323260.797	-275231.4598
GR234	177	179	112	122	122	124	122	126	113	117	149	149	162	162	118	118	87	95	118	148	88	96	127	129	101	101	148	148	131	131	167	177	-1434826.738	-313992.3293
GR241	183	185	106	118	122	124	122	124	105	115	141	145	162	162	122	122	103	103	130	132	88	98	0	0	0	0	0	0	131	131	0	0	-1390406.593	-307237.3621
GR242	169	185	112	112	126	126	122	126	115	117	147	149	0	0	114	124	95	99	132	132	88	98	127	129	101	103	148	148	131	133	167	175	-1397847.432	-319793.9532
GR248	179	179	108	110	132	132	122	128	107	117	141	145	158	158	116	122	87	99	118	126	92	98	0	0	95	101	148	150	131	137	169	175	-1398001.62	-319870.1875
GR252	169	177	106	112	124	132	124	126	113	113	147	147	162	162	116	118	95	99	0	0	88	88	127	129	89	101	146	148	131	131	167	173	-1413706.613	-308077.0093
GR254	169	185	104	104	124	126	126	126	113	115	0	0	162	162	118	122	99	103	118	118	88	92	127	129	101	101	144	148	131	131	167	177	-1409659.514	-304586.3813
GR255	177	179	108	128	124	124	126	126	107	113	147	147	162	162	122	124	87	103	132	148	88	98	125	127	101	103	144	148	131	131	169	171	-1314009.374	-269308.7242
GR257	179	183	104	104	124	124	126	126	115	117	147	151	158	162	122	122	99	103	118	132	98	98	127	127	89	103	148	148	129	141	171	175	-1390508.405	-306968.3429
GR258	169	179	112	112	124	126	122	128	113	117	0	0	162	164	116	118	87	103	132	134	88	88	125	129	101	101	144	144	127	131	175	175	-1501527.421	-351340.3545
GR259	177	179	104	108	128	132	126	128	113	115	145	149	162	162	118	122	95	99	118	148	88	88	0	0	101	101	148	150	131	131	0	0	-1403680.239	-301077.7458
GR260	179	179	104	104	124	124	122	122	107	113	141	145	158	162	116	122	97	97	120	132	98	98	125	127	101	101	144	148	131	133	169	173	-1369516.366	-346562.5883
GR261	167	179	108	118	122	124	126	126	107	117	149	149	158	158	118	120	87	87	118	148	88	92	125	125	101	101	144	148	141	141	169	175	-1457568.281	-324026.5959
GR264	169	171	106	112	124	124	122	126	113	113	0	0	162	164	116	116	95	97	118	134	84	88	125	129	89	101	144	144	127	131	171	175	-1501527.421	-351340.3545
GR265	169	169	106	118	126	132	124	126	113	113	0	0	162	162	116	116	87	87	118	118	88	92	125	127	89	101	148	148	131	141	169	171	-1413706.613	-308077.0093
GR267	177	179	106	112	122	132	124	128	113	117	0	0	162	162	122	124	87	87	126	134	0	0	127	129	0	0	0	0	131	141	0	0	-1314009.374	-269308.7242
GR270	167	185	104	118	122	132	126	126	113	115	0	0	162	162	118	118	95	99	118	148	88	88	129	129	101	101	148	148	131	141	167	171	-1417020.753	-308877.0628
GR271	167	179	104	108	122	128	126	128	113	113	0	0	0	0	116	122	95	95	120	148	88	88	125	129	101	101	148	150	131	131	171	177	-1403705.348	-301075.4352
GR272	177	179	104	112	124	124	124	126	113	117	0	0	162	162	116	118	87	97	118	148	88	88	0	0	0	0	148	148	0	0	0	0	-1453970.38	-319210.3427
GR273	169	169	104	118	126	126	126	128	113	115	0	0	162	162	116	122	87	103	118	148	88	92	125	125	101	101	144	148	131	141	169	177	-1417026.807	-308879.1472
GR274	167	179	104	104	124	132	126	126	115	115	0	0	158	158	116	122	87	105	130	132	88	92	129	129	89	101	144	148	129	131	175	177	-1398495.162	-301291.7324
GR275	169	177	104	108	126	126	126	126	105	117	0	0	158	162	114	118	97	97	118	118	84	88	125	125	101	101	144	144	131	131	171	175	-1501527.421	-351340.3545
GR276	169	183	106	130	124	132	126	126	115	117	147	151	158	158	118	124	103	103	120	132	98	98	129	129	101	101	144	146	131	131	171	173	-1396629.502	-301582.2358
GR277	179	179	112	112	124	124	122	126	105	105	0	0	164	164	114	122	87	99	118	126	88	92	125	127	101	101	144	150	129	131	171	175	-1501527.421	-351340.3545
GR283	179	183	102	112	124	124	124	126	115	117	151	151	158	162	116	116	97	97	126	126	92	98	125	129	89	89	144	144	131	141	173	179	-1470599.037	-338103.6274
GR284	169	179	104	106	124	132	126	126	113	115	145	147	162	162	118	122	95	103	118	148	88	98	127	127	95	101	144	148	131	133	167	171	-1404060.003	-300727.2591
GR286	179	179	112	118	124	126	124	126	113	115	0	0	162	162	118	118	99	99	134	148	88	88	0	0	101	101	148	148	0	0	0	0	-1429652.498	-312874.7454
GR287	177	179	106	118	124	132	122	126	115	117	0	0	158	162	122	122	99	103	118	132	88	88	0	0	101	101	0	0	131	131	0	0	-1390510.157	-306997.6001
GR289	179	185	108	118	124	126	126	126	115	115	141	151	162	162	116	116	87	99	130	132	98	98	125	129	101	101	144	148	131	133	171	171	-1369127.639	-341347.629
GR291	169	183	112	118	124	126	126	126	107	111	0	0	162	162	114	120	87	87	126	132	88	92	125	129	101	101	144	148	131	141	169	171	-1457000.791	-321159.1538
GR293	169	173	102	128	126	126	124	124	105	111	0	0	158	162	114	120	87	97	126	132	88	94	125	125	89	89	144	144	131	131	169	171	-1471545.59	-337921.4775
GR295	167	169	104	104	124	126	122	124	113	113	149	151	158	158	114	122	87	99	118	120	88	98	125	127	101	101	148	148	131	141	167	169	-1457116.539	-320948.4596
GR297	171	177	112	120	126	132	126	126	105	105	147	149	162	162	118	122	87	99	120	132	84	88	125	127	95	103	144	144	131	141	169	169	-1393529.037	-321293.8057
GR298	169	171	110	112	120	126	124	126	0	0	0	0	0	0	118	122	87	95	118	130	88	88	127	129	101	101	144	148	131	131	175	175	-1471979.462	-350978.8568
GR299	179	185	104	112	124	126	126	126	115	117	0	0	162	162	116	122	99	103	132	132	88	98	129	129	89	101	148	150	141	145	173	173	-1382603.788	-327530.1037
GR301	177	177	104	112	126	126	126	126	111	117	0	0	162	162	118	122	97	99	118	132	88	92	127	127	89	101	144	148	131	141	171	175	-1501527.421	-351340.3545
GR302	169	179	106	118	122	126	124	126	105	113	149	151	162	162	114	116	99	103	118	132	88	88	125	129	101	101	146	148	131	133	169	173	-1403891.123	-301081.4713
GR305	179	179	108	108	124	124	126	126	107	117	147	149	162	162	116	122	87	99	134	148	0	0	0	0	0	0	0	0	0	0	0	0	-1313865.797	-267816.2616
GR308	167	177	104	108	124	132	126	126	115	115	0	0	162	162	116	118	99	103	118	120	88	88	125	129	0	0	144	148	0	0	171	175	-1417019.157	-308880.6579
GR312	177	179	112	122	124	126	122	126	105	111	0	0	162	162	118	122	95	97	118	132	88	92	125	127	97	101	146	148	129	141	171	175	-1501527.421	-351340.3545
GR313	179	183	104	112	126	126	124	128	105	115	0	0	158	158	116	122	97	97	126	130	88	92	129	129	101	101	144	144	129	131	171	175	-1471356.663	-349207.1973
GR314	179	185	104	104	124	124	124	126	107	113	0	0	158	162	122	122	87	99	118	120	98	98	125	129	95	101	144	144	131	133	169	175	-1369138.663	-341347.7873
GR315	179	185	102	106	124	126	126	126	111	113	145	147	162	162	116	120	95	97	132	132	88	94	129	129	101	101	144	144	129	131	171	171	-1470599.037	-338103.6274
GR317	179	183	112	112	126	126	124	126	105	111	151	151	158	162	120	122	97	97	118	130	88	94	125	129	101	101	144	144	129	131	173	175	-1471356.663	-349207.1973
GR320	177	179	108	120	128	132	124	126	107	113	145	149	158	162	116	122	0	0	118	148	88	88	125	129	101	101	148	148	129	133	171	177	-1413706.613	-308077.0093
GR321	171	177	108	112	122	132	122	126	105	117	147	147	158	162	116	118	99	99	134	148	88	98	125	129	89	103	144	146	131	131	167	171	-1382995.738	-327570.8233
GR322	177	183	104	120	124	126	122	128	115	117	141	145	162	162	116	116	99	103	118	118	88	88	125	129	101	103	150	150	131	131	169	169	-1368023.509	-341796.4276
GR323	179	185	104	106	124	126	122	126	113	113	141	147	162	162	118	122	87	87	132	132	88	96	125	129	101	101	144	146	131	133	171	175	-1389493.897	-303390.6591
GR326	179	185	104	122	122	124	126	126	113	117	145	147	162	162	116	116	95	99	132	148	88	88	127	127	101	101	148	148	131	141	167	169	-1389556.056	-303265.2183
GR327	167	179	104	122	122	132	126	128	113	113	145	151	162	162	116	118	95	99	118	148	88	88	127	129	101	101	148	148	131	131	167	169	-1389493.897	-303390.6591
GR332	171	179	104	120	122	124	126	128	107	113	145	149	162	162	116	122	99	99	118	120	88	98	125	129	101	101	148	150	131	145	169	177	-1389493.897	-303390.6591
GR339	177	179	104	106	126	126	126	126	107	107	141	141	162	162	122	122	97	99	120	132	88	98	125	125	89	101	144	150	141	141	173	175	-1366233.823	-345614.7199
GR343	171	177	108	108	122	124	124	126	107	113	147	147	158	162	114	118	87	99	118	130	88	88	125	127	101	103	148	148	131	141	167	175	-1435425.772	-314399.7333
GR344	167	167	108	118	124	126	124	126	107	107	149	149	158	158	116	116	87	99	118	132	92	92	125	127	101	101	148	148	141	141	169	169	-1432223.092	-313506.0428
GR345	177	179	112	130	124	124	122	126	107	107	141	145	162	162	116	122	97	97	120	132	98	98	125	125	95	101	144	144	131	131	179	179	-1370231.289	-346809.8949
GR346	179	179	104	104	124	124	122	122	107	107	141	145	162	162	116	122	97	103	130	130	98	98	127	129	101	101	144	144	131	133	179	179	-1370230.112	-346802.591
GR350	179	179	104	112	122	124	124	126	107	113	0	0	162	162	114	116	87	95	118	118	84	94	125	129	97	101	144	148	131	131	167	171	-1459029.326	-325206.9844
GR351	167	179	108	112	124	126	124	126	107	115	149	149	162	162	114	118	87	99	118	134	88	88	0	0	101	101	144	148	131	137	171	177	-1413032.43	-307700.0721
GR354	169	169	112	112	124	126	122	126	107	113	145	147	162	164	116	116	87	97	118	126	92	94	125	127	89	89	144	148	129	131	0	0	-1471298.702	-349089.1076
GR355	179	185	104	118	124	126	122	126	115	117	141	147	158	162	116	118	87	103	120	126	88	92	125	129	101	103	144	148	131	133	171	173	-1393137.922	-324901.1998
GR356	177	179	106	108	122	124	126	128	111	113	141	145	0	0	122	122	87	97	134	148	98	98	127	129	97	101	144	144	131	131	173	173	-1339966.416	-337422.2931
GR357	179	179	106	108	124	124	126	128	113	117	141	147	162	162	114	114	87	87	118	130	88	98	125	127	97	103	144	144	131	131	171	171	-1339935.399	-337426.147
GR359	177	179	108	120	124	124	122	122	113	115	141	145	162	162	116	116	87	99	118	132	88	98	125	125	95	101	144	150	131	133	175	175	-1373614.236	-341098.9344
GR363	177	179	112	130	122	122	122	126	111	115	147	149	158	164	118	122	87	87	134	148	84	88	125	125	95	101	148	148	131	141	169	173	-1393151.977	-321423.368
GR364	177	179	106	112	124	124	126	126	113	113	141	147	162	162	118	122	87	87	118	132	96	98	0	0	101	103	144	148	131	131	0	0	-1373646.063	-341070.3499
GR367	167	169	104	128	124	124	124	126	107	117	147	151	158	158	122	122	99	103	118	132	92	98	0	0	89	103	144	148	129	145	175	175	-1391003.607	-310513.7572
GR369	177	179	112	128	122	122	126	126	113	113	145	151	162	162	116	122	87	97	134	148	88	98	127	127	97	101	144	146	141	141	171	175	-1339943.307	-337436.8578
GR370	169	177	104	108	126	132	126	126	113	115	145	149	162	162	116	118	99	103	118	120	88	88	129	129	101	101	144	148	131	145	167	171	-1413024.623	-307687.8733
GR371	179	183	104	118	124	124	122	124	115	115	149	151	158	158	118	122	99	99	118	130	88	88	125	127	89	101	144	148	131	133	169	173	-1412310.712	-305356.14
GR373	169	179	104	106	124	132	126	126	115	117	145	147	158	162	116	122	87	103	120	132	92	98	0	0	101	101	144	146	131	131	173	179	-1396624.449	-301582.9674
GR375	169	171	112	118	126	132	126	128	117	117	147	147	162	162	116	122	87	87	120	120	84	84	125	129	89	95	144	148	133	133	171	173	-1397692.178	-316650.543
GR376	169	169	104	106	122	124	124	126	115	115	147	149	158	158	122	122	87	103	130	132	88	92	129	129	101	101	148	150	131	131	171	179	-1393139.541	-324882.3305
GR377	179	183	106	114	122	124	124	126	107	113	141	147	162	162	114	124	87	99	134	134	84	96	0	0	97	103	144	144	127	131	169	171	-1313785.248	-267821.5512
GR378	177	185	108	112	124	132	124	126	107	107	147	149	158	162	114	118	87	99	132	148	88	98	125	129	89	101	146	148	141	141	169	173	-1393071.752	-321646.4081
GR380	177	179	118	122	122	126	126	128	107	113	145	149	162	162	116	118	87	95	118	148	88	88	127	127	101	101	148	148	131	131	167	169	-1451892.048	-318348.009
GR382	169	185	104	104	124	124	124	124	107	117	141	151	0	0	122	124	103	105	126	132	92	94	127	129	101	103	144	148	131	145	171	175	-1401994.017	-301198.8778
GR385	167	179	108	120	122	126	122	126	113	117	147	147	162	162	116	122	87	99	120	148	88	98	125	129	89	101	148	148	131	141	169	169	-1443043.596	-315585.3802
GR386	177	179	104	108	122	128	122	124	107	115	0	0	162	162	118	122	87	87	118	134	88	92	0	0	101	101	148	148	131	131	0	0	-1442457.463	-314919.8395
GR389	167	179	106	106	124	132	122	126	107	115	147	149	158	158	116	116	87	99	132	132	84	88	129	129	89	101	146	148	131	141	169	175	-1391653.531	-326243.4598
GR394	169	177	106	108	124	124	126	126	107	107	145	149	162	162	116	116	87	99	118	118	88	88	125	129	0	0	144	148	131	141	171	171	-1382518.013	-324057.7999
GR395	179	179	106	128	122	124	124	128	111	117	141	141	162	162	114	122	87	87	118	134	88	98	125	127	97	103	144	144	127	131	167	171	-1339925.426	-337441.6458
GR396	177	179	112	118	124	124	126	126	107	107	145	149	162	162	118	118	99	99	118	120	88	98	125	129	0	0	144	148	141	145	169	177	-1382487.562	-324082.9538
GR399	177	185	104	108	122	124	126	126	113	113	147	149	162	162	116	122	99	103	118	118	88	88	125	127	101	101	144	144	131	131	167	169	-1401282.694	-300876.0165
GR400	177	179	106	108	122	124	124	126	111	113	141	151	162	162	116	122	87	97	118	134	88	88	125	127	89	97	144	146	131	131	167	169	-1339935.031	-337434.7943
GR401	179	179	108	112	122	126	126	128	113	117	145	147	162	162	116	116	87	95	134	148	88	98	127	127	101	103	144	144	131	141	173	175	-1339927.516	-337434.5721
GR403	169	171	106	112	122	126	126	126	115	117	147	147	162	162	116	122	87	97	120	120	84	88	125	129	89	95	144	146	133	141	171	173	-1397747.028	-316604.4163
GR405	171	177	112	112	124	132	122	122	107	113	147	147	162	162	116	118	87	95	118	120	88	98	125	125	101	101	148	148	131	141	169	169	-1382499.301	-324072.5339
GR406	177	179	108	110	124	126	126	126	107	115	147	149	158	158	114	122	99	103	118	148	88	88	129	129	101	101	144	148	131	131	173	177	-1414671.804	-307591.8781
GR408	179	183	112	112	126	126	122	126	111	113	147	151	0	0	116	116	87	97	118	132	88	94	125	127	101	101	144	144	129	137	0	0	-1471293.589	-349196.8197
GR410	171	185	104	108	124	126	122	124	113	117	147	149	158	162	118	122	87	87	132	148	88	98	125	125	95	101	146	148	133	141	171	177	-1390805.206	-325736.1796
GR413	179	179	104	108	126	128	122	122	113	115	145	145	162	162	0	0	87	87	0	0	88	92	0	0	101	101	148	148	0	0	0	0	-1443053.975	-315674.151
GR415	177	185	104	106	124	132	122	124	113	115	147	151	162	162	118	122	99	99	118	130	88	98	125	125	89	95	144	144	129	131	171	173	-1406864.896	-304813.7354
GR419	169	169	106	108	122	132	124	126	107	115	141	151	160	162	122	122	87	87	118	132	88	92	125	125	101	101	144	150	131	141	169	175	-1397149.929	-316153.9955
GR420	179	179	106	112	126	132	126	128	107	115	147	151	158	158	122	122	99	103	132	134	88	98	129	129	101	101	144	144	131	131	173	173	-1397748.257	-316641.6816
GR421	169	179	106	110	124	132	122	126	107	115	141	151	158	158	114	116	87	87	118	118	92	98	125	129	95	101	150	150	131	131	169	175	-1397843.782	-316681.1712
GR422	179	183	104	112	124	126	126	126	107	113	145	149	162	162	122	122	87	99	120	132	88	88	125	129	89	101	144	150	131	131	169	175	-1397725.502	-316631.3637
GR426	179	183	104	112	122	126	122	126	107	115	145	149	158	158	118	124	95	103	132	132	88	92	125	129	101	101	144	148	131	131	171	173	-1397720.878	-316662.062
GR429	177	183	106	106	122	124	124	126	113	113	141	147	162	162	118	124	87	99	130	134	96	98	127	127	101	103	144	144	131	131	171	171	-1319220.729	-274471.2402
GR432	171	183	112	118	124	126	126	126	105	115	141	147	162	162	118	122	87	99	120	132	84	88	125	125	95	103	144	146	131	131	169	173	-1397722.944	-316639.2598
GR434	169	179	106	118	122	124	124	126	107	115	141	151	158	160	114	122	87	87	118	132	92	98	125	125	101	101	144	150	131	131	171	175	-1397736.613	-316646.7324
GR442	177	177	108	122	122	124	126	128	113	113	147	147	162	162	118	124	87	87	148	148	88	98	125	129	101	101	144	148	131	131	171	173	-1319067.136	-274361.1867
GR443	177	179	106	106	122	132	124	124	111	113	147	147	162	162	118	118	87	87	130	148	96	96	125	129	101	103	144	144	131	131	169	173	-1319368.529	-274371.7005
GR445	179	179	104	104	124	124	122	122	107	117	141	141	162	162	116	122	97	103	120	132	98	98	127	127	101	101	144	144	131	133	169	173	-1369963.628	-346844.8241
GR448	179	179	104	104	124	124	122	122	107	117	141	145	158	162	116	122	97	103	120	132	98	98	125	127	95	101	144	144	131	133	169	171	-1370086.494	-346803.9506
GR450	179	185	104	120	124	124	122	122	107	107	141	145	162	162	114	116	97	103	130	132	98	98	127	127	95	101	144	144	131	133	179	179	-1370230.953	-346807.8081
GR465	179	179	116	122	122	132	124	124	111	111	149	151	162	162	114	118	87	99	130	148	84	88	125	129	89	101	146	148	127	131	167	167	-1472220.064	-343318.3828
GR469	177	179	106	118	126	132	124	126	115	117	0	0	162	162	114	122	87	103	118	126	88	88	125	127	101	101	144	144	131	131	171	173	-1392755.665	-302178.3663
GR470	169	169	104	104	126	128	126	126	113	113	145	147	162	164	118	122	87	103	118	118	88	92	125	129	101	101	148	148	131	141	0	0	-1412818.991	-304925.9572
GR471	179	179	112	128	122	124	122	126	107	107	141	147	158	162	116	116	99	99	148	148	88	88	125	127	101	103	148	150	131	141	173	179	-1369523.764	-340675.8096
GR476	177	177	108	130	124	132	126	126	107	113	149	149	162	162	116	118	95	99	118	118	88	88	125	129	89	101	144	148	131	131	169	171	-1393463.776	-302166.0587
GR477	171	173	104	112	124	124	122	124	107	117	141	141	162	162	118	124	97	99	118	126	88	92	0	0	101	103	144	148	127	141	171	175	-1469972.405	-339844.6095
GR478	177	179	108	118	124	132	126	126	107	117	147	149	162	162	116	116	99	99	118	118	88	98	0	0	101	101	148	148	131	133	169	171	-1393516.175	-302887.8721
GR479	179	185	120	120	124	126	122	126	107	107	147	151	162	162	122	122	87	97	118	130	98	98	125	125	101	101	144	144	129	131	167	173	-1365951.482	-343457.1619
GR480	177	185	106	120	126	126	122	126	107	113	141	147	162	162	122	122	87	97	118	118	92	98	125	125	101	101	144	144	129	133	167	175	-1365951.482	-343457.1619
GR481	177	177	108	120	124	126	122	126	113	117	147	149	162	162	114	116	99	99	118	118	88	88	125	127	89	101	148	148	131	133	169	169	-1393516.175	-302887.8721
GR482	169	177	106	122	124	126	124	126	107	113	141	141	158	162	122	122	99	103	118	120	98	98	125	125	101	101	144	144	129	131	175	175	-1343603.399	-350180.9283
GR485	179	179	104	118	122	126	126	126	107	117	141	141	162	162	122	122	97	99	120	132	98	98	125	129	95	101	144	148	133	141	171	173	-1365951.482	-343457.1619
GR486	179	179	104	130	122	126	122	126	107	107	145	149	162	162	114	122	97	99	132	132	98	98	125	127	95	101	144	144	131	131	173	175	-1365951.482	-343457.1619
GR487	167	167	108	122	122	124	122	126	107	113	149	149	162	162	116	118	95	99	120	134	88	92	127	129	101	101	148	148	131	137	169	177	-1393542.002	-302881.6509
GR490	169	169	104	104	126	126	124	126	113	117	145	153	158	158	116	122	97	103	118	130	88	98	127	129	101	101	144	144	131	141	171	175	-1365951.482	-343457.1619
GR491	177	183	106	112	126	126	122	126	107	117	141	141	162	162	122	122	99	99	118	120	98	98	125	125	89	101	144	150	131	141	173	175	-1365951.482	-343457.1619
GR495	169	183	104	104	122	126	122	124	107	113	145	147	158	158	122	122	87	87	120	130	0	0	125	127	0	0	144	144	133	141	169	175	-1363437.578	-343904.9008
GR496	179	179	106	116	122	124	122	128	107	111	147	147	162	162	118	124	87	87	126	126	88	96	129	129	97	101	144	144	121	131	171	173	-1325494.953	-244322.8106
GR500	173	183	104	122	122	124	122	124	107	113	141	141	158	162	122	122	87	103	118	118	98	98	125	125	0	0	144	144	131	131	167	173	-1356127.091	-355702.1285
GR501	0	0	118	118	126	126	124	126	107	107	0	0	0	0	116	116	87	97	118	132	88	88	127	129	0	0	144	144	131	145	175	179	-1356854.421	-354184.9845
GR502	177	179	112	120	122	122	122	126	107	113	145	145	158	158	122	122	87	87	118	132	98	98	125	125	101	101	144	144	129	131	173	175	-1360192.162	-351221.1449
GR506	179	185	104	118	122	124	124	128	107	115	141	149	162	162	116	122	87	87	130	132	88	92	125	129	0	0	144	144	131	133	169	175	-1376921.84	-341060.8411
GR507	169	183	104	120	122	124	124	126	107	113	141	145	162	162	114	122	97	99	132	132	84	88	129	129	89	101	144	148	131	131	169	171	-1372905.775	-343752.6587
GR508	179	185	104	112	122	124	122	124	113	117	145	147	158	158	122	122	87	87	120	132	88	98	125	125	0	0	146	148	129	141	171	173	-1356613.055	-354019.9699
GR511	179	179	104	120	122	126	122	126	107	107	141	147	158	158	122	122	97	99	118	130	98	98	125	127	0	0	144	144	133	141	173	175	-1364732.927	-343380.6445
GR512	179	185	104	130	124	126	122	128	115	115	141	147	162	162	122	122	105	105	118	132	98	98	127	129	95	101	144	148	131	133	173	175	-1369376.424	-346503.4422
GR516	179	185	120	120	124	124	122	122	107	117	145	147	162	162	114	122	97	105	132	132	88	98	127	127	103	103	144	144	131	141	173	175	-1369426.444	-346522.2664
GR522	171	179	104	118	124	126	122	126	115	117	0	0	162	162	114	116	103	105	130	132	98	98	125	129	0	0	144	144	133	133	173	173	-1369382.518	-346517.4574
GR524	177	179	118	120	124	126	122	124	115	117	141	151	162	162	116	122	87	103	118	130	88	98	0	0	0	0	144	144	131	133	169	179	-1372817.829	-341981.6731
GR528	169	177	104	104	124	126	122	126	113	117	141	153	162	162	114	122	97	97	120	120	88	98	0	0	0	0	144	146	129	131	173	179	-1363665.365	-343592.6888
GR531	179	179	104	108	122	126	122	124	107	115	0	0	158	162	116	122	97	99	132	132	98	98	125	129	0	0	144	144	133	141	171	179	-1363653.064	-343581.7971
GR534	169	185	104	104	124	126	122	126	107	115	149	149	158	158	116	124	95	103	118	132	98	98	125	125	0	0	144	148	131	145	171	171	-1372871.251	-341997.822
GR535	177	177	120	120	126	126	124	126	115	115	0	0	0	0	116	116	87	99	126	130	84	98	125	129	0	0	144	144	131	133	169	179	-1363779.026	-343798.3318
GR538	169	179	104	106	124	124	126	126	107	107	141	141	158	162	122	122	87	99	120	120	98	98	125	129	0	0	144	148	131	131	169	175	-1363806.216	-343705.1986
GR543	177	185	104	120	122	126	124	126	107	107	145	147	158	158	116	122	97	99	118	132	88	92	125	125	95	101	144	144	131	131	175	179	-1363675.219	-343594.3371
GR544	169	185	104	104	122	124	122	126	107	117	0	0	0	0	114	116	87	97	120	132	88	98	125	125	89	101	144	146	131	131	179	179	-1363030.575	-344312.946
